# Supplementary material
Source: MDPI journal article supplement (https://www.mdpi.com/2073-4344/11/6/677)
Supplement: s1 [file s1]

**APPENDIX B**

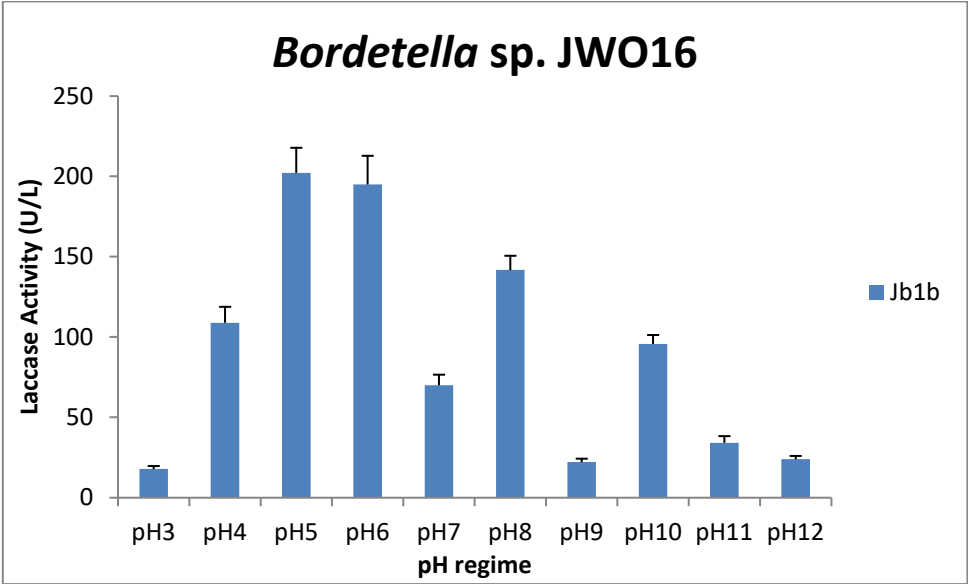

**SF1:** Effect of pH on Jb1b laccase production

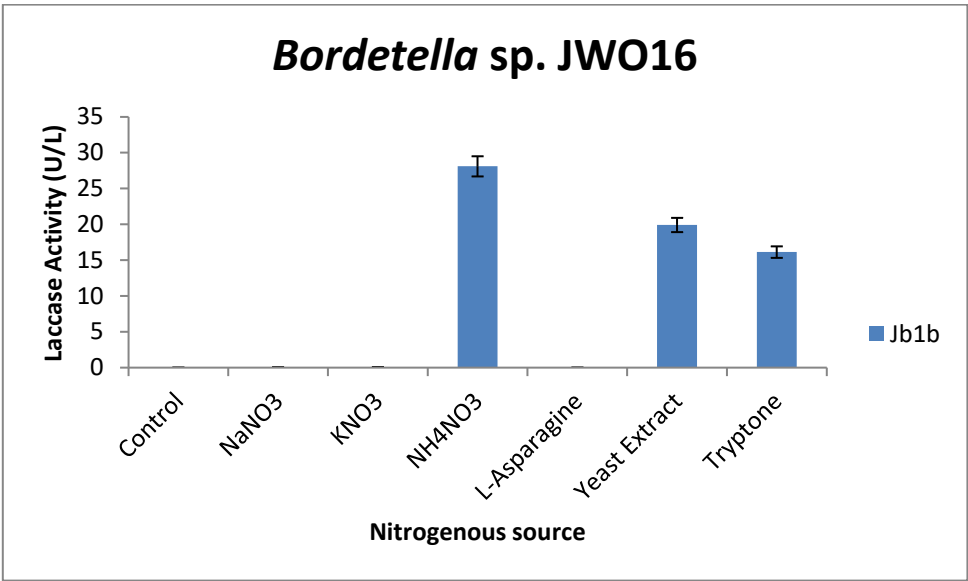

**SF2:** Effect of nitrogenous sources of Jb1b laccase production

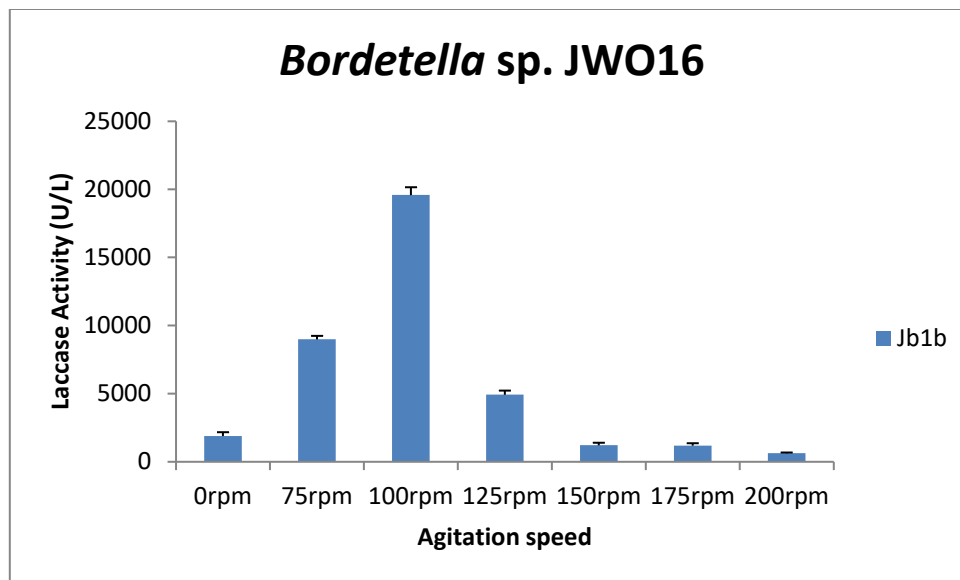

**SF3:** Effect of agitation speed on Jb1b laccase production.

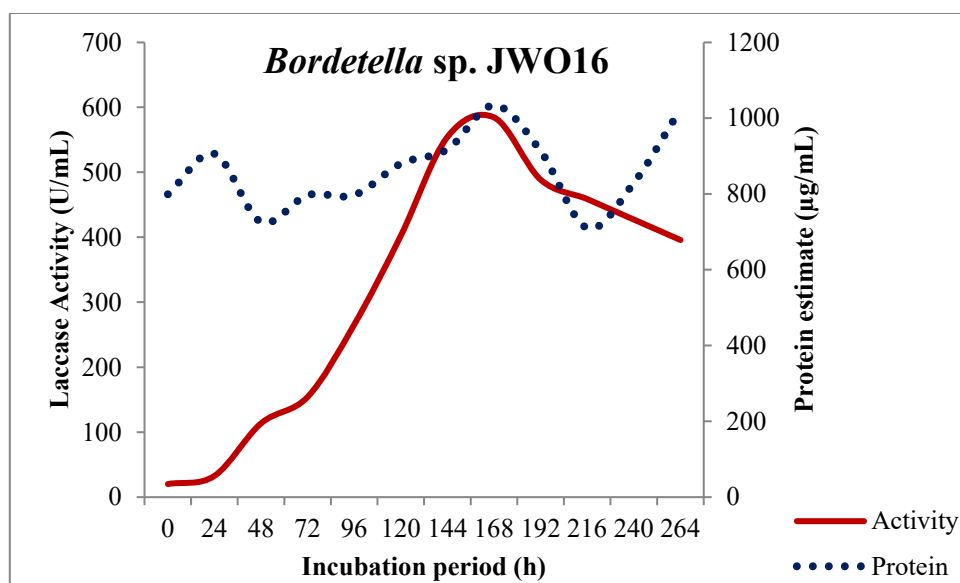

**SF4:** Time course study of Jb1b on laccase

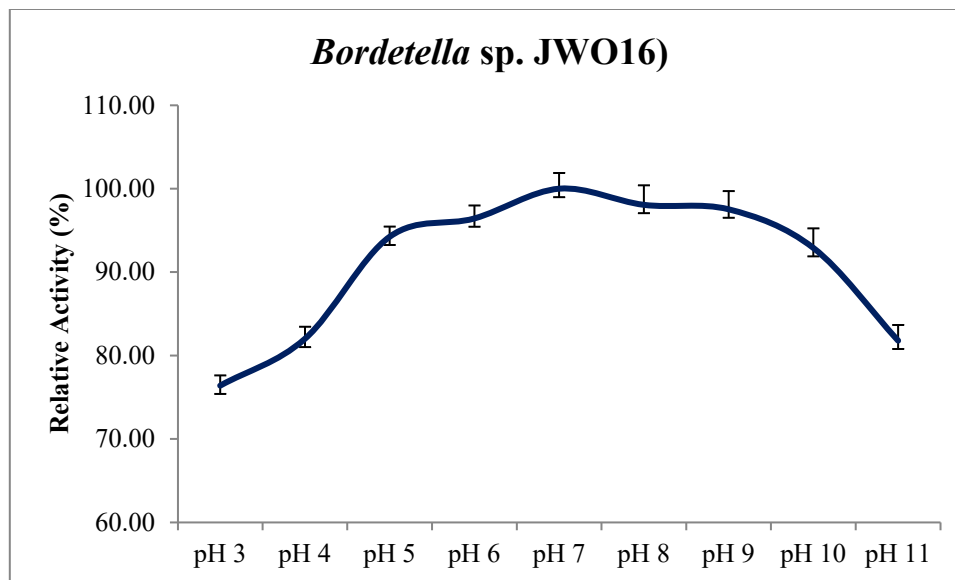

**SF5:** Effect of pH regimes on Jb1b laccase activity

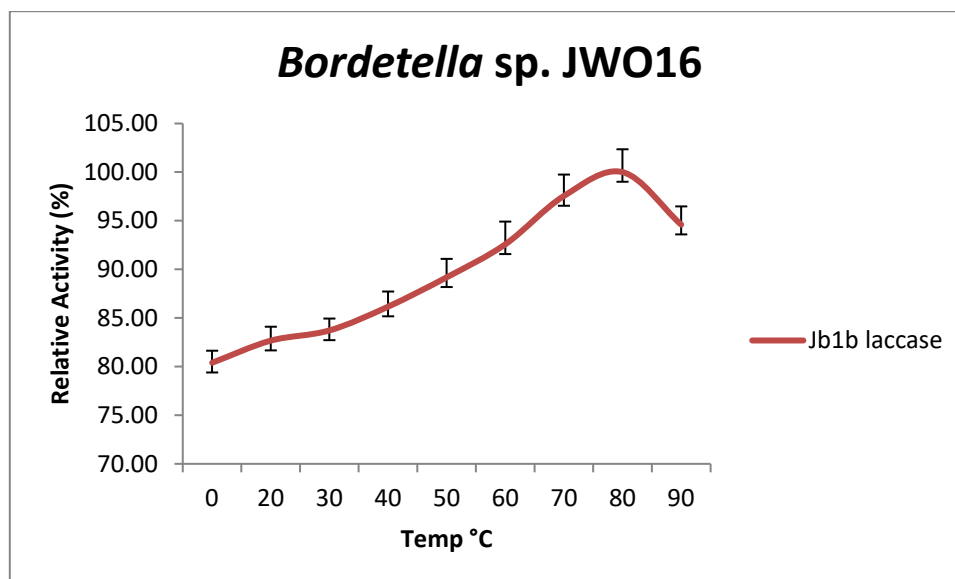

**SF6:** Effect of temperature profile on Jb1b laccase activity
